# Supplementary material for: Novel NAC-loaded poly(lactide-co-glycolide acid) nanoparticles for cataract treatment: preparation, characterization, evaluation of structure, cytotoxicity, and molecular docking studies
Source: PeerJ. 2018 Jan 30;6:e4270. doi: 10.7717/peerj.4270 (PMC5796282; doi:10.7717/peerj.4270)
Supplement: Supplemental Information 5 [file peerj-06-4270-s005.xls]

## Sheet: Sayfa1
	1	2	3	4	5	6	7	8	9	10	11	12
	A	2124	2258	2314	2220	2239	2250	2312	2312	2312	2406	2537	2830
	B	2204	2434	2545	2385	2417	2410	2393	2424	2335	2277	2270	2397
	C	2227	2425	2383	2434	2471	2419	2466	2379	2277	2321	2373	1816
	D	2447	2509	2515	2548	2545	2459	2378	2442	2335	2303	1985	1770
	E	2327	2535	2601	2552	2509	2431	2319	2225	2282	2353	2015	2149
	F	2314	2494	2632	2746	2857	2559	2609	2362	2351	2313	2400	2179
	G	2120	2298	2424	2767	2835	2552	2395	2285	2123	2337	2448	2271
	H	2302	2883	2281	2727	2741	2043	2000	2078	1993	2126	2329	2201
0ug							STD							STD
1ug	A	2.124	2.258	2.314	2.22	2.239	0.0693758		2.25	2.312	2.312	2.312	2.406	0.0558462
4ug	B	2.204	2.434	2.545	2.385	2.417	0.123558		2.41	2.393	2.424	2.335	2.277	0.0610221
7ug	C	2.227	2.425	2.383	2.434	2.471	0.095289		2.419	2.466	2.379	2.277	2.321	0.0753644
10ug	D	2.447	2.509	2.515	2.548	2.545	0.0406964		2.459	2.378	2.442	2.335	2.303	0.0670545
15ug	E	2.327	2.535	2.601	2.552	2.509	0.10491		2.431	2.319	2.225	2.282	2.353	0.0772334
20ug	F	2.314	2.494	2.632	2.746	2.857	0.212751		2.559	2.609	2.362	2.351	2.313	0.134953								kontrol
30ug	G	2.12	2.298	2.424	2.767	2.835	0.305723		2.552	2.395	2.285	2.123	2.337	0.156588		2.448	2.271	2.4	2.179	2.329	2.201	2.30467
40ug	H	2.302	2.883	2.281	2.727	2.741	0.276493		2.043	2	2.078	1.993	2.126	0.0555383
50ug		2.537	2.83	2.27	2.397	2.373	0.216897		1.985	1.77	2.015	2.149	1.816	0.154404
		NAC NP	STD		NAC peptide	STD
	0ug	2.30467	0.107608	0ug	2.30467	0.107608
	1ug	2.231	0.0693758	1ug	2.3184	0.0558462
	4ug	2.397	0.123558	4ug	2.3678	0.0610221
	7ug	2.388	0.095289	7ug	2.3724	0.0753644
	10ug	2.5128	0.0406964	10ug	2.3834	0.0670545
	15ug	2.5048	0.10491	15ug	2.322	0.0772334
	20ug	2.6086	0.212751	20ug	2.4388	0.134953
	30ug	2.4888	0.305723	30ug	2.3384	0.156588
	40ug	2.5868	0.276493	40ug	2.048	0.0555383
	50ug	2.4814	0.216897	50ug	1.947	0.154404
